# Supplementary material for: A Survey of Liver Cancer Specialists’ Views on the National Liver Cancer Screening Program in Korea
Source: PubMed Central journal article supplement — J Liver Cancer. 2020 Mar 31;20(1):53–9. doi: 10.17998/jlc.20.1.53 (PMC10035697; doi:10.17998/jlc.20.1.53), 2020-03-31
Supplement: jlc-20-1-53-suppl1.pdf [file jlc-20-1-53-suppl1.pdf]

**Supplementary Table 1.** Survey results stratified according to year of experiences among hepatologists (n=72)

| Question                                                                                                                                                                | Experience less than 10 years (n=30) | Experience more 10 years (n=42) | P-value |
|-------------------------------------------------------------------------------------------------------------------------------------------------------------------------|--------------------------------------|---------------------------------|---------|
| Do you agree that hepatocellular carcinoma surveillance in high risk patients can lower the risk of hepatocellular carcinoma-related death?                             |                                      |                                 | 0.37    |
| Very agree                                                                                                                                                              | 80                                   | 67                              |         |
| Agree                                                                                                                                                                   | 20                                   | 31                              |         |
| Disagree                                                                                                                                                                | 0                                    | 2                               |         |
| Do you know about the current National Liver Cancer Screening Program in Korea?                                                                                         |                                      |                                 | 0.78    |
| Know very well                                                                                                                                                          | 83                                   | 86                              |         |
| Know well                                                                                                                                                               | 17                                   | 14                              |         |
| Do you think the National Liver Cancer Screening Program currently implemented in Korea contributes in lowering hepatocellular carcinoma-related deaths?                |                                      |                                 | 0.031   |
| Very contributing                                                                                                                                                       | 37                                   | 14                              |         |
| Contribute to some extent                                                                                                                                               | 53                                   | 76                              |         |
| Not contributing                                                                                                                                                        | 0                                    | 10                              |         |
| How many points can you give to the National Liver Cancer Screening Program? (median, quartile)                                                                         | 8 (7-8)                              | 7 (6-8)                         | <0.001  |
| Do you think current National Liver Cancer Screening Program target population is appropriate target?                                                                   |                                      |                                 | 0.16    |
| Very appropriate                                                                                                                                                        | 13                                   | 3                               |         |
| Appropriate                                                                                                                                                             | 60                                   | 64                              |         |
| Inappropriate                                                                                                                                                           | 23                                   | 33                              |         |
| Very inappropriate                                                                                                                                                      | 3                                    | 0                               |         |
| Do you think 'cirrhosis over 40 years of age' is appropriate target? (yes)                                                                                              | 70                                   | 76                              | 0.55    |
| Do you think 'chronic hepatitis B virus infection over 40 years of age' is appropriate target? (yes)                                                                    | 80                                   | 74                              | 0.54    |
| Do you think 'chronic hepatitis C virus infection over 40 years of age' is appropriate target? (yes)                                                                    | 67                                   | 67                              | 1.00    |
| Agreements on surveillance target                                                                                                                                       |                                      |                                 |         |
| Patients with liver cirrhosis should be surveillance targets regardless of age                                                                                          | 97                                   | 86                              | 0.12    |
| Starting age for surveillance should be different for men and women                                                                                                     | 0                                    | 29                              | 0.001   |
| Chronic hepatitis patients (e.g., fatty liver, alcoholic liver disease) with advanced fibrosis should be surveillance targets regardless of age                         | 73                                   | 76                              | 0.78    |
| Anti-HCV positive patients without advanced fibrosis should not be included as a surveillance target regardless of age                                                  | 20                                   | 24                              | 0.70    |
| Chronic hepatitis C patients who achieved sustained virological response and without advanced fibrosis should not be included as surveillance targets regardless of age | 37                                   | 29                              | 0.46    |
| Chronic hepatitis B patients without advanced fibrosis should not be included as surveillance targets regardless of age                                                 | 10                                   | 7                               | 0.66    |
| Did you know the target population selection process of the National Liver Cancer Screening Program? (yes)                                                              | 57                                   | 59                              | 0.87    |

**Supplementary Table 1.** Continued

| Question                                                                                                                                   | Experience less than 10 years (n=30) | Experience more 10 years (n=42) | P-value |
|--------------------------------------------------------------------------------------------------------------------------------------------|--------------------------------------|---------------------------------|---------|
| Do you think the target population selection process of the National Liver Cancer Screening Program should be improved?                    |                                      |                                 | 0.54    |
| Very necessary                                                                                                                             | 17                                   | 29                              |         |
| Necessary                                                                                                                                  | 73                                   | 62                              |         |
| Not necessary                                                                                                                              | 10                                   | 9                               |         |
| Agreements on opinions about reasons why selection process need improvement                                                                |                                      |                                 |         |
| The screening targets identified by disease classification codes may not match true surveillance targets                                   | 40                                   | 79                              | 0.001   |
| There can be a privacy violation problem                                                                                                   | 10                                   | 21                              | 0.20    |
| The current process identifies individuals who use medical services, and paradoxically, misses individuals who do not use medical services | 77                                   | 83                              | 0.48    |
| Agreements on opinions about how selection process should be improved                                                                      |                                      |                                 |         |
| Disease classification codes used to select the target population should be simplified                                                     | 37                                   | 41                              | 0.74    |
| Register target population as cancer or rare/incurable disease                                                                             | 43                                   | 41                              | 0.80    |
| Minimize national program and increase private sector program using more incentives                                                        | 43                                   | 55                              | 0.33    |
| The foremost priority for improvement                                                                                                      |                                      |                                 |         |
| Surveillance target                                                                                                                        | 17                                   | 14                              | 0.35    |
| Target identification process                                                                                                              | 13                                   | 17                              |         |
| Surveillance methods                                                                                                                       | 33                                   | 14                              |         |
| Screening rate                                                                                                                             | 7                                    | 19                              |         |
| Quality control                                                                                                                            | 7                                    | 10                              |         |
| Duplication problem                                                                                                                        | 23                                   | 21                              |         |
| Others                                                                                                                                     | 0                                    | 5                               |         |
| Agreements on area that need improvement                                                                                                   |                                      |                                 |         |
| Surveillance target                                                                                                                        | 63                                   | 71                              | 0.46    |
| Target identification process                                                                                                              | 57                                   | 64                              | 0.51    |
| Surveillance methods                                                                                                                       | 50                                   | 50                              | 1.00    |
| Screening rate                                                                                                                             | 60                                   | 52                              | 0.52    |
| Quality control                                                                                                                            | 47                                   | 60                              | 0.28    |
| Duplication problem                                                                                                                        | 57                                   | 69                              | 0.28    |

Values are presented as %.
