# Supplementary material for: A Survey of Liver Cancer Specialists’ Views on the National Liver Cancer Screening Program in Korea
Source: PubMed Central journal article supplement — J Liver Cancer. 2020 Mar 31;20(1):53–9. doi: 10.17998/jlc.20.1.53 (PMC10035697; doi:10.17998/jlc.20.1.53), 2020-03-31
Supplement: jlc-20-1-53-suppl2.pdf [file jlc-20-1-53-suppl2.pdf]

Supplementary Fig 1. A complete survey (in Korean language).

## 전문가(대한간암학회 회원 대상) 의견 수집을 위한 설문지

1. 선생님의 전문 진료과는 무엇입니까?

한 개의 타원형만 표시합니다.

- 내과-소화기
- 내과-소화기외 분과 혹은 일반의
- 외과
- 영상의학과
- 가정의학과
- 방사선종양학과
- 병리과
- 기타: \_\_\_\_\_

2. 전문의 취득년도는 언제입니까?

\_\_\_\_\_

3. 현재 진료하시는 기관은 어디입니까?

한 개의 타원형만 표시합니다.

- 대학병원
- 종합병원
- 개인의원
- 건강검진센터
- 기타: \_\_\_\_\_

Supplementary Fig 1. Continued

4. 간암 고위험군을 대상으로 간암 선별검사(검진)을 시행하는 것이 간암 사망 위험을 낮춘다고 생각하십니까?

*한 개의 타원형만 표시합니다.*

- 매우 동의한다  
 동의한다  
 동의하지 않는다  
 전혀 동의하지 않는다

5. 현재 우리나라에서 시행되고 있는 국가 간암 검진 사업에 대해 알고 계십니까?

*한 개의 타원형만 표시합니다.*

- 잘 알고 있다.  
 어느정도 알고있다.  
 잘 모른다  
 전혀 모른다

6. 현재 우리나라에서 시행되고 있는 국가 간암 검진 사업은 우리나라 간암 사망위험을 낮추는데 기여하고 있다고 생각하십니까?

*한 개의 타원형만 표시합니다.*

- 매우 기여하고 있다  
 어느정도 기여하고 있다  
 기여하지 못하고 있다  
 전혀 기여하지 못하고 있다

7. 현재 우리나라에서 시행되고 있는 국가 간암 검진 사업에 몇 점을 주시겠습니까? (최저 0점-최고 10점)

Supplementary Fig 1. Continued

8. 현재 국가 간암 검진 대상자는 만 40세 이상 남녀 중 간경변증, B형간염 바이러스, C형간염 바이러스 보유자들입니다. 이 대상군은 적절하다고 생각하십니까?

한 개의 타원형만 표시합니다.

- 매우 적절하다  
 적절하다  
 적절하지 않다  
 매우 적절하지 않다

9. 현재 대상자가 적절하지 않다고 생각하시면 적절하지 않다고 생각하시는 모든 경우를 선택하여 주십시오

해당 사항에 모두 표시하세요.

- 만 40세 이상 간경변증  
 만 40세 이상 B형간염 바이러스 보유자  
 만 40세 이상 C형간염 바이러스 보유자

10. 다음은 간암 검진 대상자에 대한 의견들입니다. 동의하시는 모든 경우를 선택하여 주십시오

해당 사항에 모두 표시하세요.

- 간경변증은 나이 제한이 없어야 한다  
 간암 검진 대상자의 시작 연령은 남/녀가 달라야 한다  
 진행성 섬유화가 동반된 만성간질환(지방간염, 알코올 간질환, 만성 바이러스 간염 등)은 나이 제한없이 포함되어야 한다  
 진행성 섬유화가 동반되지 않은 C형 간염바이러스 항체 양성 환자는 나이 제한없이 포함되지 않아야 한다  
 진행성 섬유화가 동반되지 않았으며, 치료로 완전 바이러스 반응이 획득된 만성 C형 간염 환자는 나이 제한없이 포함되지 않아야 한다  
 진행성 섬유화가 동반되지 않은 만성 B형 간염 환자는 나이 제한없이 포함되지 않아야 한다

기타:  \_\_\_\_\_

Supplementary Fig 1. Continued

11. 현재 국가 간암 건진 대상자 선정은 해당연도 전 2년간 간암 발생 고위험군 해당자이며, 간암 발생 고위험군은 B형 간염바이러스 항원 양성, C형 간염바이러스 항체 양성, B형 또는 C형 간염바이러스에 의한 만성 간질환 환자로서 해당하는 질병분류코드로 의료이용을 한 경우로 규정하고 있습니다. 이러한 선정 방식을 알고 계셨습니까?

표 4 간암발생고위험군 질병코드

| 질 환 명                               | 질병분류 코드(code)                                                                                                                        |
|-------------------------------------|--------------------------------------------------------------------------------------------------------------------------------------|
| 간경변증<br>**는 0, 1, 2, 9를 의미          | K702, K703(K7030, K7031), K74, K740(K740*), K741(K741*), K742(K742*), K743(K743*), K744(K744*), K745(K745*), K746(K746*), K765, K766 |
| B형 간염바이러스 항원 양성,<br>C형 간염바이러스 항체 양성 | B18, B180, B181(B1810, B1818), B182, B188, B189, Z225                                                                                |
| B형 또는 C형 간염바이러스에<br>의한 만성 간질환 환자    | B19, B190, B199                                                                                                                      |

한 개의 타원형만 표시합니다.

- 알고 있었다  
 모르고 있었다

12. 질병분류 코드를 이용한 대상자 선정 방식이 개선이 필요하다고 생각하십니까?

한 개의 타원형만 표시합니다.

- 매우 필요하다  
 필요하다  
 필요하지 않다  
 전혀 필요하지 않다

Supplementary Fig 1. Continued

13. 질병분류 코드를 이용한 대상자 선정 방식이 개선이 필요하다고 생각하신다면, 해당하는 이유를 모두 선택해 주십시오.

해당 사항에 모두 표시하세요.

- 질병분류코드상 간암 검진 대상자는 간암 발생 고위험군과 일치하지 않을 수 있다
- 질병분류코드로 의료이용을 한 경우를 대상으로 선정하는 방식은 개인정보 위반 소지가 있다
- 질병분류코드로 의료이용을 한 경우를 대상으로 선정하면, 의료이용을 잘 하고 있는 환자는 대상으로 선정되고, 역설적으로 의료이용을 잘 하고 있지 않은 환자들은 대상자에서 누락이 된다

기타:  \_\_\_\_\_

14. 다음은 대상자 선정 방식 개선에 대한 의견들입니다. 동의하시는 의견을 모두 선택하여 주십시오

해당 사항에 모두 표시하세요.

- 질병분류 코드 중 대상자인 질병분류 코드를 몇가지로 줄이고, 의료기관에서 간암 검진 대상자는 특정 질병코드를 등록하게 한다
- 암 및 희귀질환 산정특례 등록 방식처럼, 간암 검진 대상자임을 의료기관에서 5년마다 등록하게 하고, 등록된 사람들에게 간암 검진을 5년간 제공한다
- 간암 검진은 고위험군에 대한 검진이며, 고위험군 여부는 민감 개인정보이므로, 국가에서 대상자를 선정하는 현 방식은 철회하는 것이 맞고, 검진이 아닌 진료시에 간암 선별검사를 위한 초음파 등 검사는 추가적인 진료비 혜택을 주는 방식으로 전환해야 한다

기타:  \_\_\_\_\_

Supplementary Fig 1. Continued

15. 회원님께서 국가 간암 검진 사업을 담당하신다면 가장 우선적으로 개선할 부분은 어떤 항목이라고 생각하시는지 가장 중요한 한가지만 선택하여 주십시오

한 개의 타원형만 표시합니다.

- 대상 환자군 개선 (검진 대상자의 확대 또는 축소)
- 대상자 선정방식 개선(질병분류코드로 의료이용을 한 경우에 따른 선정방식의 개선)
- 검진 방법의 개선 (고위험군의 경우 초음파 외 CT/MRI의 허용, AFP외 PIVKA-II등 다른 종양표지자 검사 활용, 초고위험군은 3개월 간격 검사 허용 등)
- 검진 수검률 증가(대국민 홍보 및 수검자 혜택 증가 등을 통한 수검률 증가)
- 검진 질관리 사업(검진 사업의 질 담보)
- 국가 간암 검진과 진료 영역의 중복 문제 해결(국가 검진을 받는 사람들과 의료기관에서 진료받는 환자들의 이중 간암 검진 문제 해결)
- 기타: \_\_\_\_\_

16. 회원님께서 국가 간암 검진 사업 중 개선이 필요한 항목이라고 생각하시는 항목이 있다면, 해당하는 항목을 모두 선택하여 주십시오

해당 사항에 모두 표시하세요.

- 대상 환자군 개선 (검진 대상자의 확대 또는 축소)
- 대상자 선정방식 개선(질병분류코드로 의료이용을 한 경우에 따른 선정방식의 개선)
- 검진 방법의 개선 (고위험군의 경우 초음파 외 CT/MRI의 허용, AFP외 PIVKA-II등 다른 종양표지자 검사 활용, 초고위험군은 3개월 간격 검사 허용 등)
- 검진 수검률 증가(대국민 홍보 및 수검자 혜택 증가 등을 통한 수검률 증가)
- 검진 질관리 사업(검진 사업의 질 담보)
- 국가 간암 검진과 진료 영역의 중복 문제 해결(국가 검진을 받는 사람들과 의료기관에서 진료받는 환자들의 이중 간암 검진 문제 해결)
- 기타:  \_\_\_\_\_

17. 한 개의 타원형만 표시합니다.

- 옵션 1



Supplementary Fig 1. Continued

18. 국가 간암 검진과 관련하여 제안하시고 싶은 의견을 자유롭게 기술해 주십시오.

---

---

---

---

---

---

이 콘텐츠는 Google이 만들거나 승인하지 않았습니다.

Google 설문지
